# Supplementary material
Source: PubMed Central journal article supplement (PMC6278936)
Supplement: NIHMS1509109-supplement-3.pdf [file NIHMS1509109-supplement-3.pdf]

## SUPPLEMENTARY TABLES

**Supplementary Table 1.** Selected genes important in regulating lipid homeostasis.

| <b>Gene name</b>                                      | <b>Gene Symbol</b> |
|-------------------------------------------------------|--------------------|
| ATP-binding cassette, sub-family A, member 1          | ABCA1              |
| ATP-binding cassette, sub-family G, member 1          | ABCG1              |
| ATP-binding cassette, sub-family G, member 8          | ABCG8              |
| Acetyl-CoA carboxylase alpha                          | ACACA              |
| Acetyl-CoA carboxylase beta                           | ACACB              |
| Acyl-CoA Oxidase 1                                    | ACOX1              |
| Acyl-CoA Oxidase 2                                    | ACOX2              |
| Acyl-CoA Oxidase 3                                    | ACOX3              |
| Apolipoprotein A1                                     | APOA1              |
| Apolipoprotein C-III                                  | APOC3              |
| Apolipoprotein E                                      | APOE               |
| Apolipoprotein L1                                     | APOL1              |
| Apolipoprotein M                                      | APOM               |
| CD36 Antigen                                          | CD36               |
| Cholesteryl ester transfer protein                    | CETP               |
| Carnitine palmitoyltransferase 1A (liver)             | CPT1A              |
| Carnitine palmitoyltransferase 1B                     | CPT1B              |
| Cytochrome P450, family 1, subfamily B, polypeptide 1 | CYP1B1             |
| Fatty acid synthase                                   | FASN               |
| G protein-coupled bile acid receptor 1                | GPBAR1             |
| 3-Hydroxy-3-Methylglutaryl-CoA Reductase              | HMGCR              |
| Insulin induced gene 1                                | INSIG1             |
| Lecithin-Cholesterol Acyltransferase                  | LCAT               |
| Low density lipoprotein receptor                      | LDLR               |
| Oxidized Low Density Lipoprotein Receptor 1           | LOX1               |
| Macrophage Scavenger Receptor 1                       | MSR1               |
| Neutral Cholesterol Ester Hydrolase 1                 | NCEH1              |
| Niemann-Pick disease, type C1                         | NPC1               |
| Niemann-Pick disease, type C2                         | NPC2               |
| Nuclear Receptor Subfamily 1 Group H Member 2         | NR1H2              |
| Nuclear Receptor Subfamily 1 Group H Member 3         | NR1H3              |
| Nuclear Receptor Subfamily 1 Group H Member 3         | NR1H4 (FXR)        |
| Proprotein Convertase Subtilisin/Kexin Type 9         | PCSK9              |
| Perilipin 1                                           | PLIN1              |
| Perilipin 2                                           | PLIN2              |
| Perilipin 3                                           | PLIN3              |
| Perilipin 4                                           | PLIN4              |
| Perilipin 5                                           | PLIN5              |
| Peroxisome Proliferator Activated Receptor Alpha      | PPARA              |
| Peroxisome Proliferator Activated Receptor Gamma      | PPARG              |
| SREBF chaperone                                       | SCAP               |
| SREBF Chaperone                                       | SCARB1             |

|                                                          |        |
|----------------------------------------------------------|--------|
| Stearoyl-CoA desaturase                                  | SCD    |
| Sterol O-acyltransferase 1                               | SOAT1  |
| Sterol Regulatory Element Binding Transcription Factor 1 | SREBF1 |
| Sterol Regulatory Element Binding Transcription Factor 2 | SREBF2 |

**Supplementary Table 2.** Primers used in quantitative real-time PCR.

| Gene          | Sense                     | Antisense                  |
|---------------|---------------------------|----------------------------|
| <i>Abca1</i>  | CGTTTCCGGGAAGTGTCCCTA     | GCTAGAGATGACAAGGAGGATGGA   |
| <i>Abcg1</i>  | AGGTCTCAGCCTTCTAAAGTTCCTC | TCTCTCGAAGTGAATGAAATTTATCG |
| <i>Apoc3</i>  | GCATCTGCCCGAGCTGAAGAG     | CTGAAGTGATTGTCCATCCAGC     |
| <i>Apoe</i>   | CTGACAGGATGCCTAGCCG       | CGCAGGTAATCCCAGAAGC        |
| <i>Apom</i>   | CCTGGGCCTGTG G TACTTTA    | CCATGTTTCCTTTCCCTTCA       |
| <i>Gapdh</i>  | CCTGGAGAAACCTGCCAAGTATG   | GGTCCTCAGTGTAGCCCAAGATG    |
| <i>Hmgcr</i>  | AGCCGAAGCAGCACATGAT       | CTTGTGGAATGCCTTGTGATTG     |
| <i>Ldlr</i>   | GAAGTCGACACTGTACTGACCACC  | CTCCTCATTCCCTCTGAAAGCCAT   |
| <i>Nceh1</i>  | AGCCTGCAGTTTGAGCTTA       | AGAGTCGGTATTTCTGGAGACG     |
| <i>Npc1</i>   | AACCGTGACACTGCAGGACAT     | CTCATAATGGTGCAGTTCTTGTGT   |
| <i>Scarb1</i> | TTTGGAGTGGTAGTAAAAAGGGC   | TGACATCAGGGACTCAGAGTAG     |
| <i>Soat1</i>  | ATGCGGACTTTTCAATGAGG      | AGCAAGATGAAGCCCAGAAA       |
| <i>Srebf2</i> | GTGGAGCAGTCTCAACGTCA      | TGGTAGGTCTCACCCAGGAG       |
